# Supplementary material
Source: publisher figshare collection journal article supplement (https://karger.figshare.com/ndownloader/files/22459928)

**Table S1. Characteristics of the dataset for estimating the reference change value of serum creatinine (dataset 1).**

|                                          | <b>Initial eGFR<math>\geq</math>60 ml/min<br/>N=317,391</b> | <b>Initial eGFR&lt;60 ml/min<br/>N=27,303</b> |
|------------------------------------------|-------------------------------------------------------------|-----------------------------------------------|
| Age, year                                | 52.4 (15.8)                                                 | 66.1 (15.8)                                   |
| 18 to 40                                 | 71,673 (22.6)                                               | 2,075 (7.6)                                   |
| 41 to 60                                 | 134,734 (42.5)                                              | 6,167 (22.6)                                  |
| 61 to 80                                 | 100,763 (31.7)                                              | 13,709 (50.2)                                 |
| 81 to 100                                | 10,221 (3.2)                                                | 5,352 (19.6)                                  |
| Males                                    | 159,935 (50.4)                                              | 16,072 (58.9)                                 |
| Initial eGFR, ml/min/1.73 m <sup>2</sup> | 100.8 (17.6)                                                | 43.5 (12.2)                                   |
| 15 to 29                                 | 0                                                           | 4,680 (17.1)                                  |
| 30 to 59                                 | 0                                                           | 22,623 (82.9)                                 |
| 60 to 89                                 | 83,009 (26.2)                                               | 0                                             |
| $\geq$ 90                                | 234,382 (73.8)                                              | 0                                             |
| Charlson's comorbidity index             | 3 (1, 4)                                                    | 4 (3, 5)                                      |
| Creatinine test interval (day)           |                                                             |                                               |
| $\leq$ 2                                 | 61,221 (19.3)                                               | 8,949 (32.8)                                  |
| 3 to 7                                   | 151,732 (47.8)                                              | 13,119 (48.0)                                 |
| 8 to 14                                  | 66,744 (21.0)                                               | 3,978 (14.6)                                  |
| 15 to 30                                 | 37,694 (11.9)                                               | 1,257 (4.6)                                   |

Age and the estimated glomerular filtration rate (eGFR) are presented as mean (SD); Charlson's comorbidity index as median (25<sup>th</sup>, 75<sup>th</sup> percentile); all others as N (%).

**Table S2. Percentage of ACKI events that cROCK detected earlier than KDIGO stratified by the number of serum creatinine testing**

| SCr testing <sup>a</sup> | N    | Number of days that detected ACKI earlier <sup>b</sup> |          |                |                |
|--------------------------|------|--------------------------------------------------------|----------|----------------|----------------|
|                          |      | 1 day                                                  | 2 days   | 3 or more days | 1 or more days |
| 1                        | 990  | 0 (0)                                                  | 0 (0)    | 0 (0)          | 0 (0)          |
| 2                        | 921  | 35 (3.8)                                               | 30 (3.3) | 32 (3.5)       | 97 (10.5)      |
| 3                        | 495  | 21 (4.2)                                               | 14 (2.8) | 26 (5.3)       | 61 (12.3)      |
| 4 or more                | 739  | 38 (5.1)                                               | 32 (4.3) | 123 (16.6)     | 193 (26.1)     |
| Total samples            | 3145 | 94 (3.0)                                               | 76 (2.4) | 181 (5.8)      | 351 (11.2)     |

<sup>a</sup> the number of SCr testing available before detection of acute-on-chronic kidney injury (ACKI) by KDIGO.

<sup>b</sup> calculated as the detection date of ACKI by KDIGO minus the detection date by cROCK in days. Data was presented as N (%).

**Table S3. Risk of in-hospital mortality by ACKI definitions and need for intensive care**

| AKI status <sup>a</sup>                   | Patients, N | Dead, N | Person year <sup>b</sup> | Death Rate <sup>a</sup> | HR <sup>c</sup> (95% CI) |
|-------------------------------------------|-------------|---------|--------------------------|-------------------------|--------------------------|
| <b>with intensive care<sup>d</sup></b>    |             |         |                          |                         |                          |
| R-K-                                      | 698         | 14      | 28.3                     | 49.5                    | —                        |
| R+K-                                      | 103         | 6       | 6.1                      | 98.5                    | 3.81 (1.41 – 10.31)      |
| R-K+                                      | 32          | 0       | 1.2                      | 0                       | ND <sup>e</sup>          |
| R+K+                                      | 804         | 155     | 46.3                     | 334.6                   | 9.32 (5.78 - 15.0)       |
| <b>without intensive care<sup>d</sup></b> |             |         |                          |                         |                          |
| R-K-                                      | 16,085      | 70      | 661.8                    | 10.6                    | —                        |
| R+K-                                      | 1,409       | 42      | 66.3                     | 63.4                    | 5.37 (3.50 – 8.23)       |
| R-K+                                      | 189         | 4       | 9.7                      | 41.3                    | 2.81 (0.85 – 9.34)       |
| R+K+                                      | 2,341       | 250     | 126.3                    | 197.9                   | 9.86 (6.84 -14.21)       |

<sup>a</sup> denotes absence (-) and presence (+) of acute-on-chronic kidney injury (ACKI) by ROCK (R) and KDIGO (K) criterion, respectively.

<sup>b</sup> Per 100 person years.

<sup>c</sup> HR, hazard ratio; 95% CI, 95% confidence interval.

<sup>d</sup> Cox model was adjusted for age, gender, eGFR, and Charlson's comorbidity score and stratified by study center and need for intensive care. eGFR and AKI status were coded as time-dependent variables.

<sup>e</sup> not determined due to small sample size and no death events.

**Table S4. Characteristics of the dataset for analysis of mortality after discharge (dataset 3)**

|                                           | R-K <sup>-a</sup><br>N=8,611 | R+K-<br>N=702  | R-K+<br>N=113  | R+K+<br>N=1,438 | Total<br>N=10,864 |
|-------------------------------------------|------------------------------|----------------|----------------|-----------------|-------------------|
| Age <sup>b</sup> , year                   | 66.4 (14.6)                  | 68.0 (14.6)    | 63.6 (14.5)    | 65.3 (14.6)     | 66.3 (14.6)       |
| Males                                     | 5,379 (62.5)                 | 417 (59.4)     | 97 (85.8)      | 911 (63.4)      | 6,804 (62.6)      |
| Baseline eGFR, ml/min/1.73 m <sup>2</sup> | 44.6 (8.2)                   | 45.8 (8.2)     | 39.0 (7.3)     | 44.3 (8.7)      | 44.6 (8.3)        |
| Follow-up years                           | 2.8 (2.3, 3.4)               | 2.7 (2.2, 3.4) | 2.8 (2.4, 3.4) | 2.7 (2.2, 3.4)  | 2.8 (2.3, 3.4)    |
| Diabetes                                  | 1,524 (17.7)                 | 135 (19.2)     | 22 (19.5)      | 248 (17.2)      | 1,929 (17.8)      |
| Hypertension                              | 3,136 (36.4)                 | 269 (38.3)     | 52 (46.0)      | 508 (35.3)      | 3,965 (36.5)      |
| Charlson's comorbidity index              | 4 (3, 5)                     | 4 (3, 6)       | 4 (3, 5))      | 4 (3, 5)        | 4 (3, 5)          |
| Need for intensive care                   | 342 (4.0)                    | 45 (6.4)       | 22 (19.5)      | 368 (25.6)      | 777 (7.2)         |
| Death after discharge                     | 1,010 (11.7)                 | 117 (16.7)     | 14 (12.4)      | 274 (19.1)      | 1,415 (13.0)      |

<sup>a</sup> denotes absence (-) and presence (+) of acute-on-chronic kidney injury (ACKI) by ROCK (R) and KDIGO (K) criterion, respectively.

<sup>b</sup> Age and eGFR are presented as mean (SD); Charlson's comorbidity index, length of stay and testing number as median (25<sup>th</sup>, 75<sup>th</sup> percentile); all others as N (%).

**Table S5. Characteristics of the dataset for analysis of CKD progression (dataset 4)**

|                                              | R-/K-<br>N=1,973 | R+/K-<br>N=167 | R-/K+<br>N=17  | R+/K+<br>N=226 | Total<br>N=2,383 |
|----------------------------------------------|------------------|----------------|----------------|----------------|------------------|
| Age, year                                    | 70.6 (14.8)      | 69.8 (16.1)    | 61.3<br>(17.7) | 69.0 (14.1)    | 70.3 (14.8)      |
| Males                                        | 1,314<br>(66.6)  | 90 (53.9)      | 15 (88.2)      | 153 (67.7)     | 1,572 (66.0)     |
| Baseline eGFR,<br>ml/min/1.73 m <sup>2</sup> | 44.4 (8.1)       | 45.2 (8.1)     | 41.8 (8.6)     | 43.2 (8.4)     | 44.3 (8.1)       |
| Diabetes                                     | 458 (23.2)       | 37 (22.2)      | 5 (29.4)       | 45 (19.9)      | 545 (22.9)       |
| Hypertension                                 | 782 (39.6)       | 76 (45.5)      | 7 (41.2)       | 81 (35.8)      | 946 (39.7)       |
| Charlson's comorbidity<br>index              | 5 (4, 6)         | 5 (3, 6)       | 4 (2, 5)       | 5 (4, 6)       | 5 (4, 6)         |
| Need for intensive care                      | 59 (3.0)         | 6 (3.6)        | 2 (11.8)       | 25 (11.1)      | 92 (3.9)         |

Age and eGFR are presented as mean (SD); Charlson's comorbidity index as median (25<sup>th</sup>,75<sup>th</sup> percentile); all others as N (%).

**Figure S1. Density plots of log creatinine ratio by strata of initial creatinine value and measurement interval**

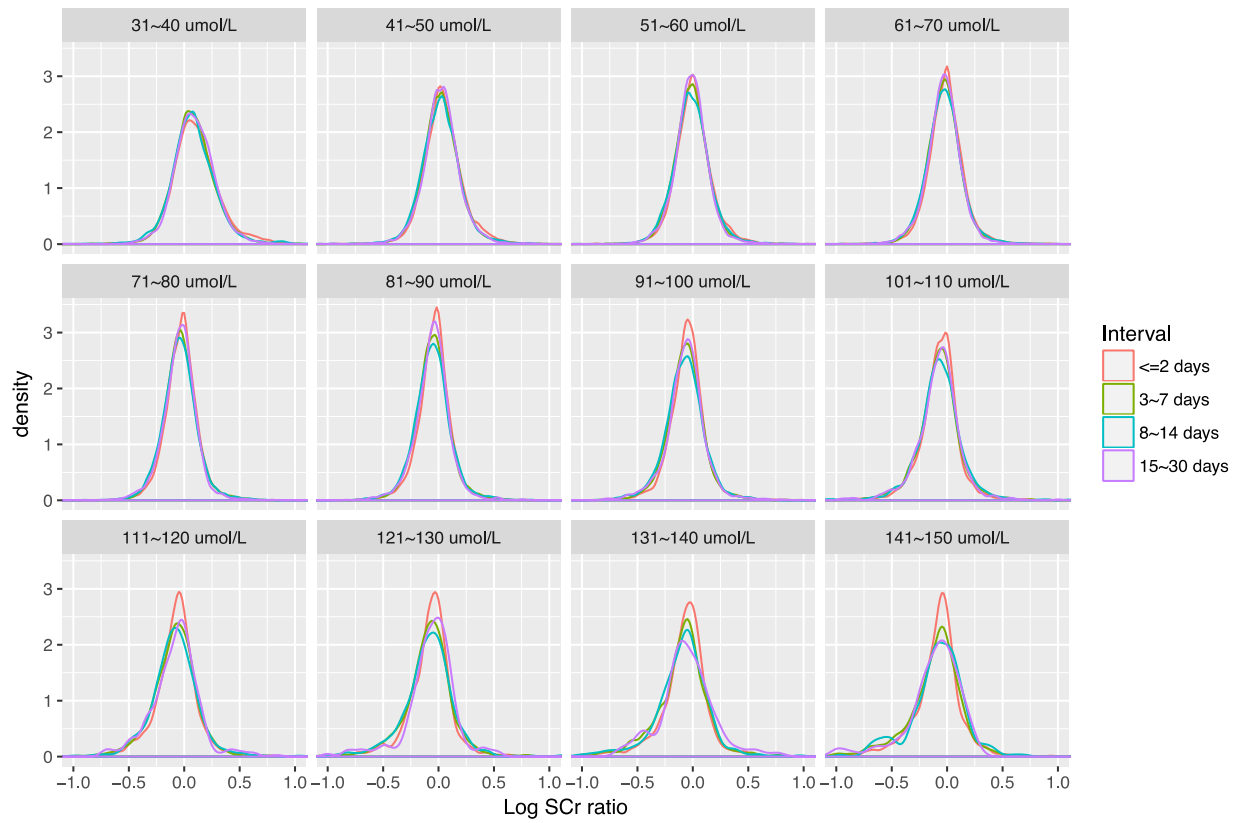

Supplement: Supplementary file 1 [file 22459928]
